# Supplementary material for: Solvent effect on neutral chiral supramolecular assemblies and their distinct receptor behaviour towards anions
Source: Royal Society of Chemistry journal article supplement (doi:10.1039/c4dt02778g), 2014-11-19
Supplement: c4dt02778g1.pdf [file c4dt02778g1.pdf]

## **Solvent effect on the neutral chiral supramolecular assemblies and their distinct receptor behaviour towards anions**

**Navnita Kumar<sup>a</sup>, Sadhika Khullar<sup>a,#</sup> and Sanjay K. Mandal<sup>\*a</sup>**

<sup>a</sup>Department of Chemical Sciences, Indian Institute of Science Education and Research, Mohali, Sector 81, Manauli PO, S.A.S. Nagar, Mohali (Punjab) 140306, INDIA

<sup>#</sup>Current address: Department of Chemistry, DAV University, Jalandhar, Punjab 144001, INDIA

<sup>\*</sup>e-mail: sanjaymandal@iisermohali.ac.in

## **Supplementary Information**

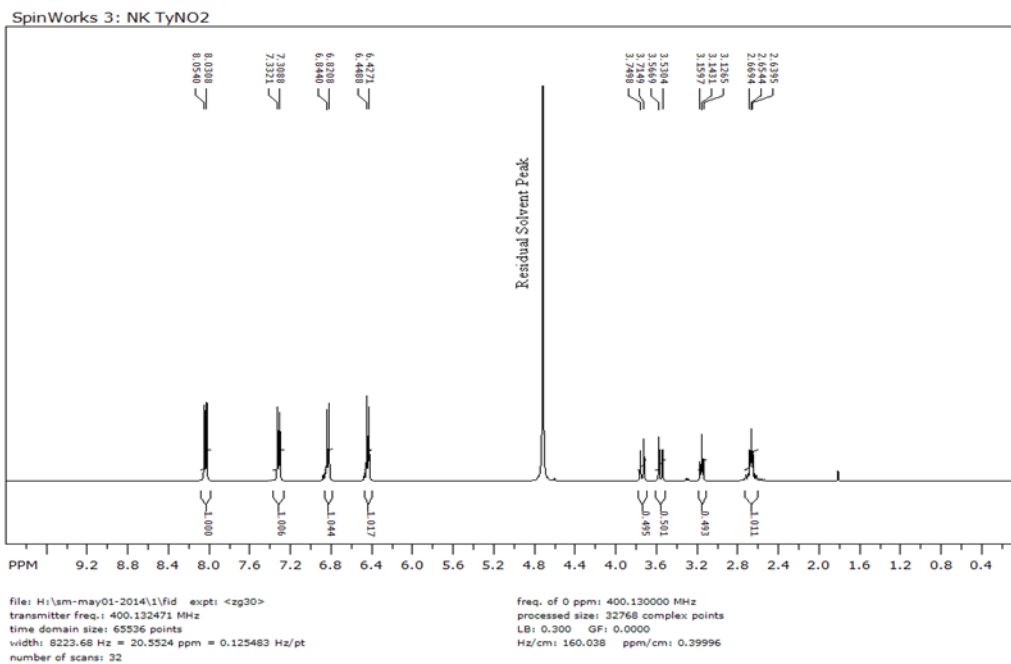

Fig. S1  $^1\text{H}$  NMR spectrum of  $\text{H}_2\text{Tyr-4-nitro}$ .

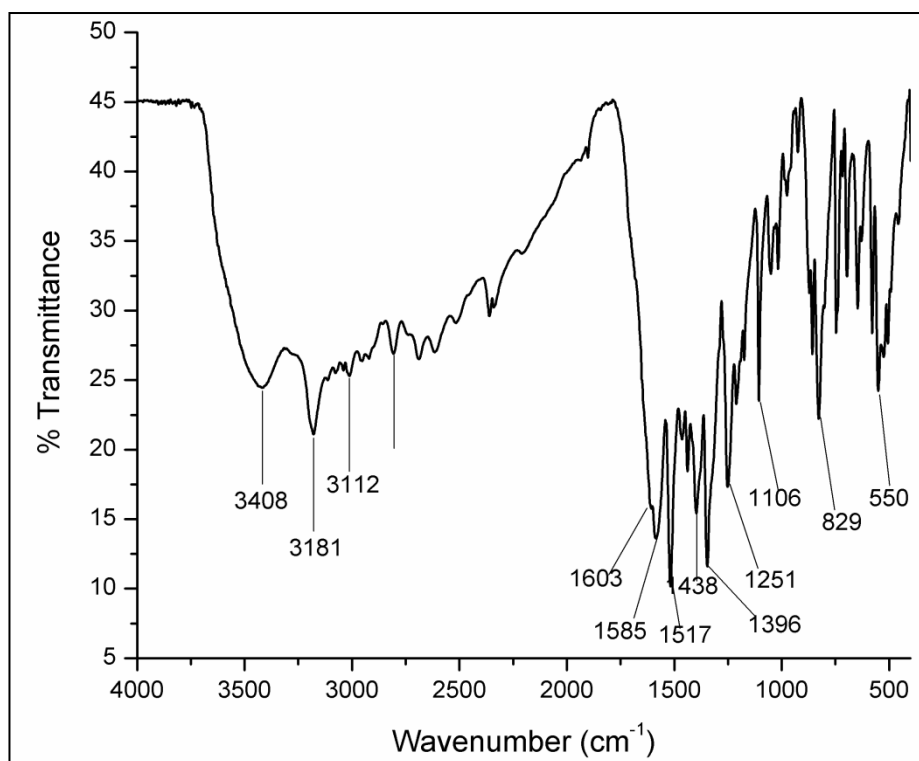

Fig. S2 FTIR spectrum of  $\text{H}_2\text{Tyr-4-nitro}$ .

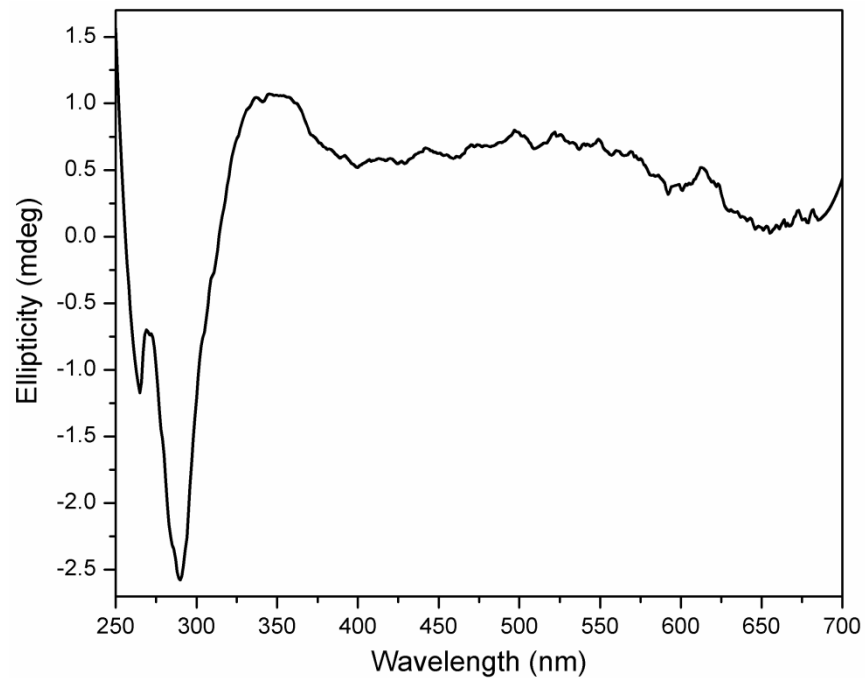

**Fig. S3** CD Spectrum of H<sub>2</sub>Tyr-4-Nitro in DMSO (in the range of 250-700nm).

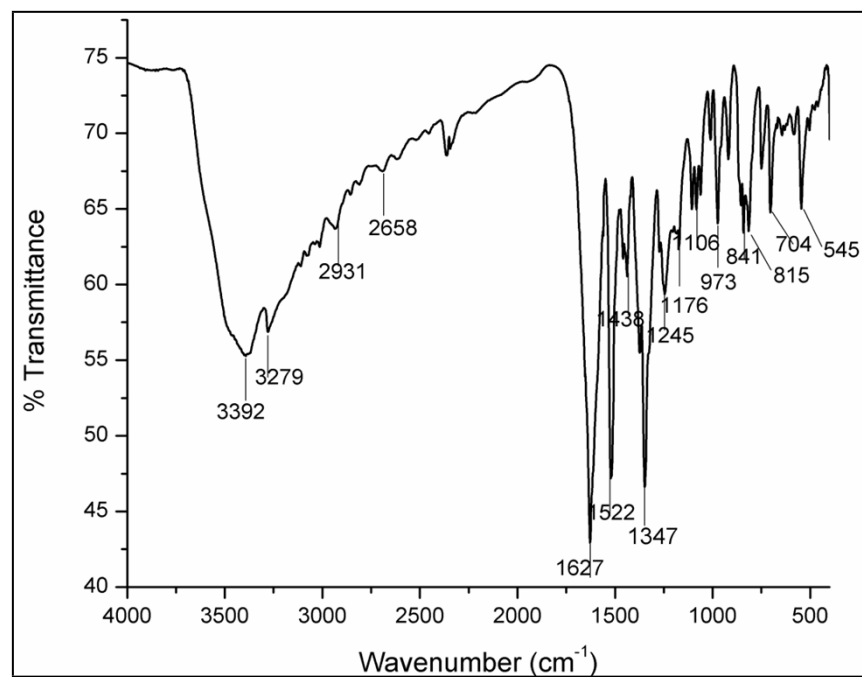

**Fig. S4** FTIR spectrum of **1**.

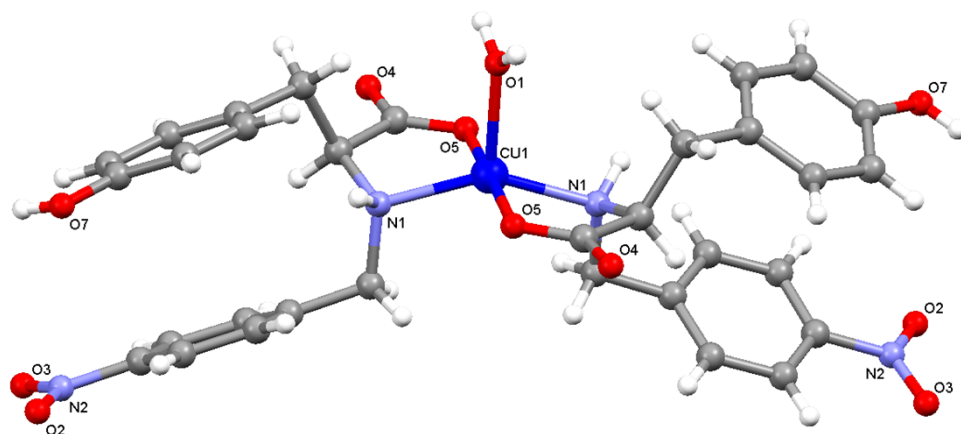

**Fig. S5** Asymmetric unit of **1a** (DMSO molecules are omitted for clarity).

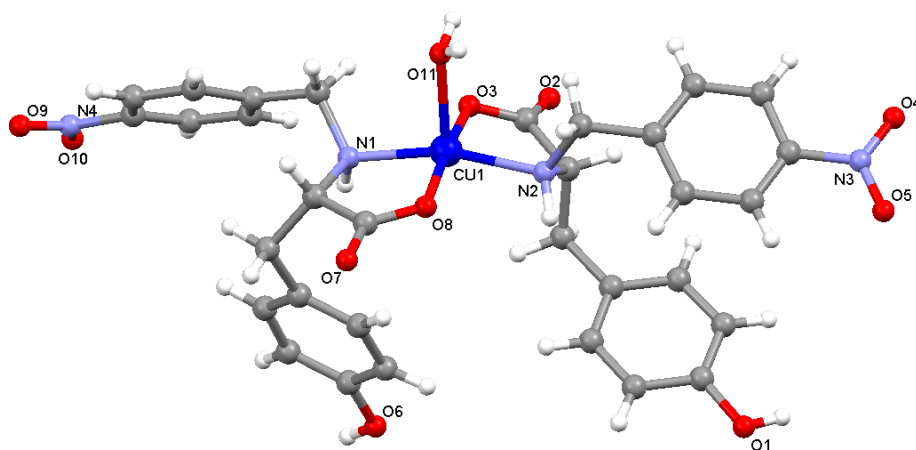

**Fig. S6** Asymmetric unit of **1b** (Methanol molecules are omitted for clarity).

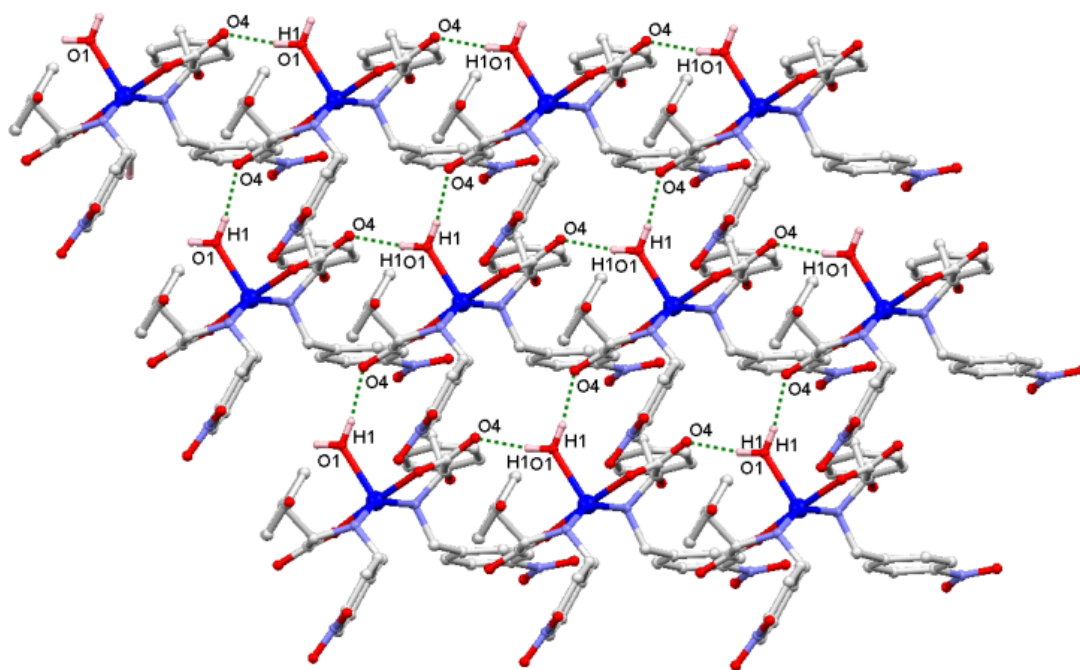

Fig. S7 2D supramolecular ensemble in **1a**.

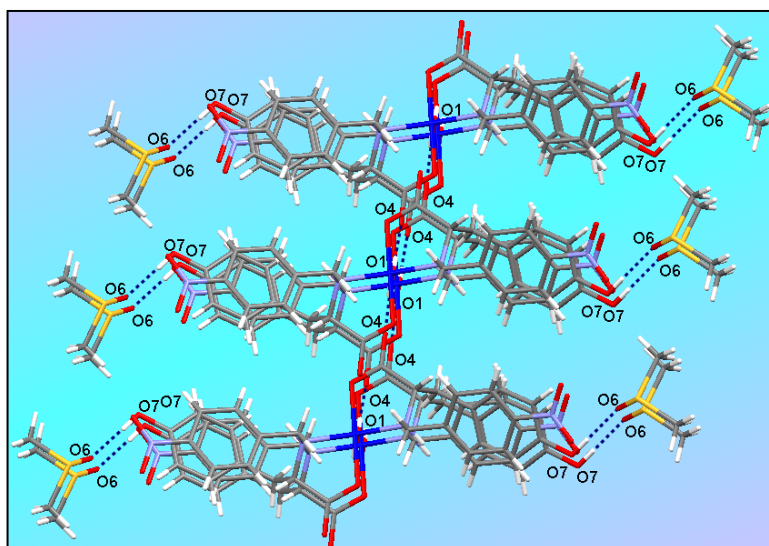

Fig. S8 Interaction of the DMSO molecules with the supramolecular array in **1a**.

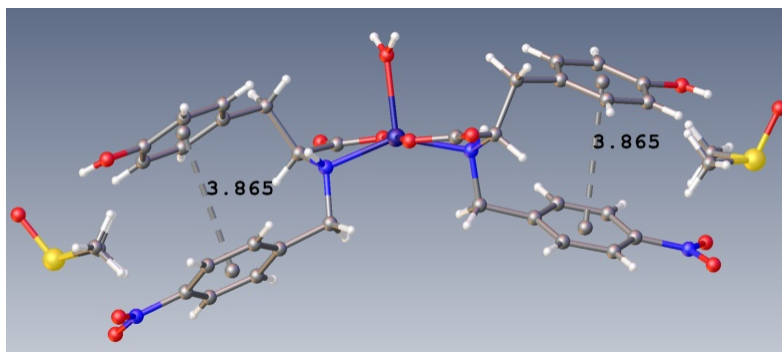

**Fig. S9** Intramolecular  $\pi$ - $\pi$  interactions in **1a**.

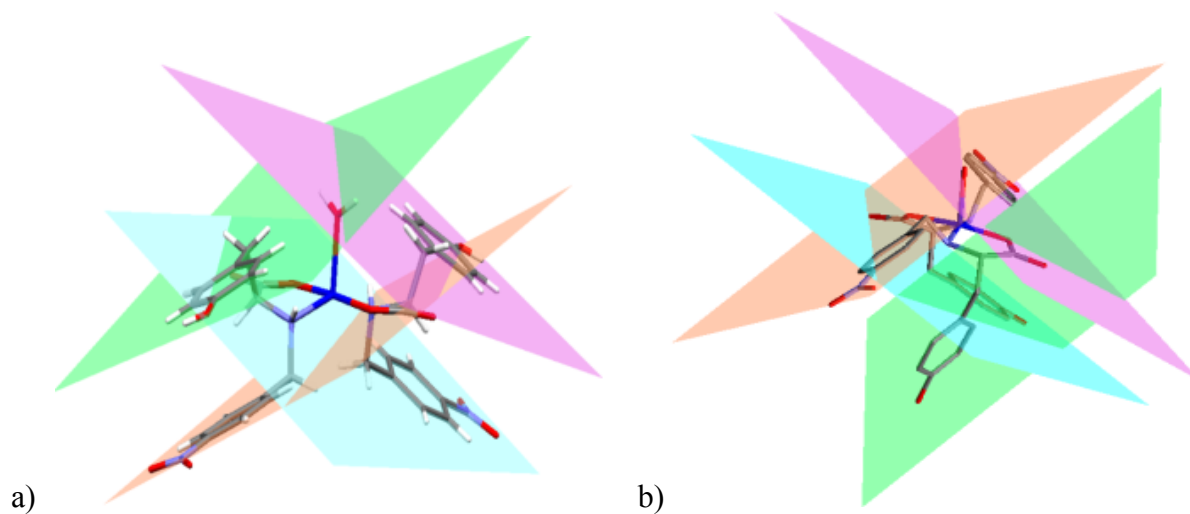

**Fig. S10** Parallel (a) and anti-parallel (b) planes containing aromatic rings of the ligand in **1a** and **1b**, respectively.

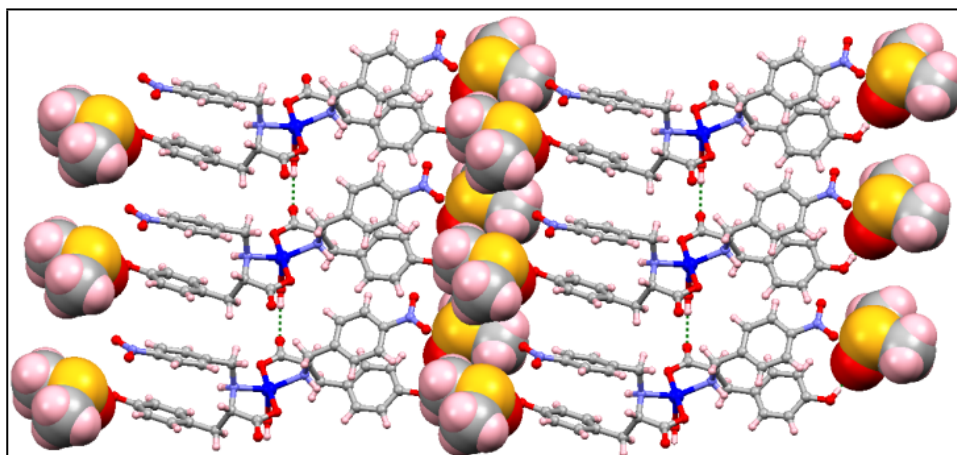

**Fig. S11** Encapsulation of the DMSO cluster within the supramolecular array in **1a**.

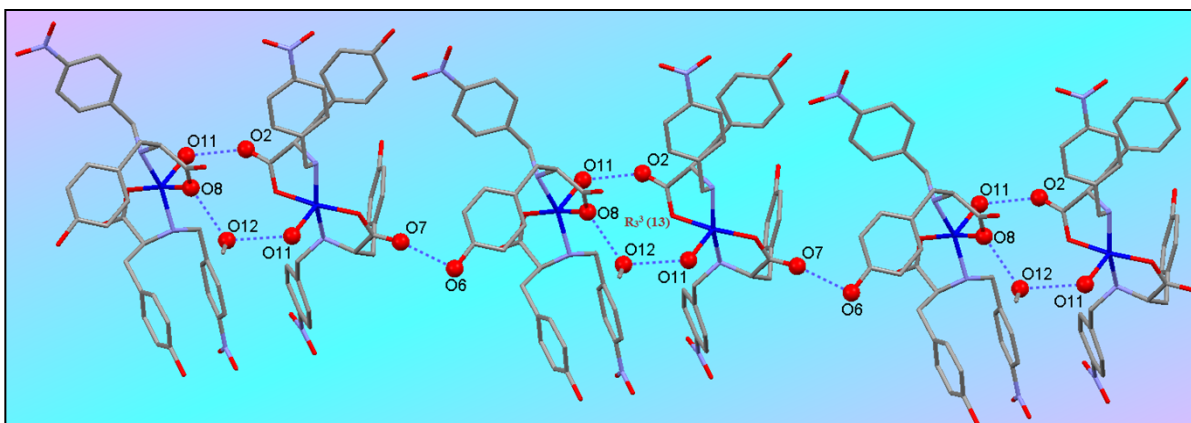

**Fig. S12** 1D supramolecular chain in **1b**.

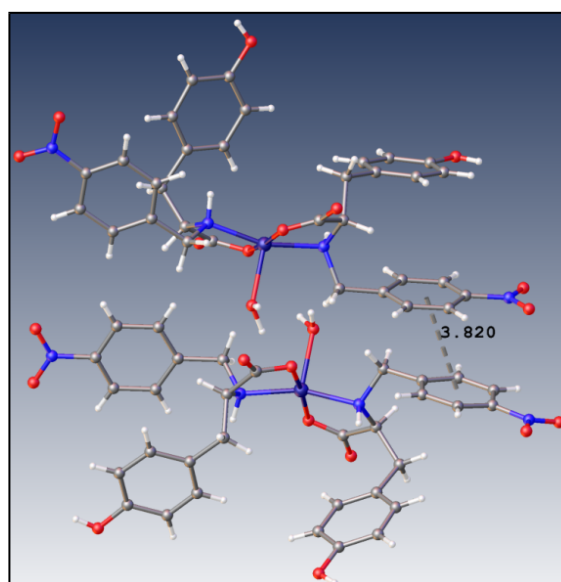

**Fig. S13** Intermolecular  $\pi$ - $\pi$  interactions in **1b**.

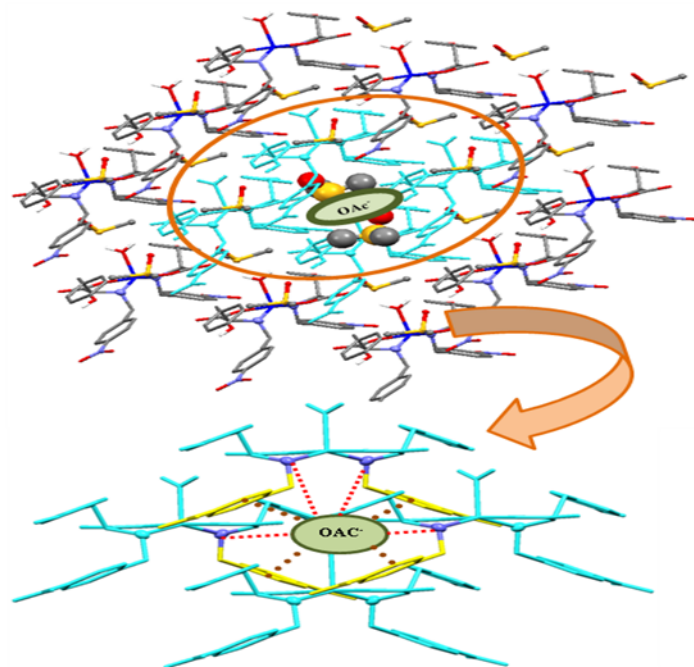

**Fig. S14.** Schematic representation of interactions of OAc<sup>-</sup> with **1a**.

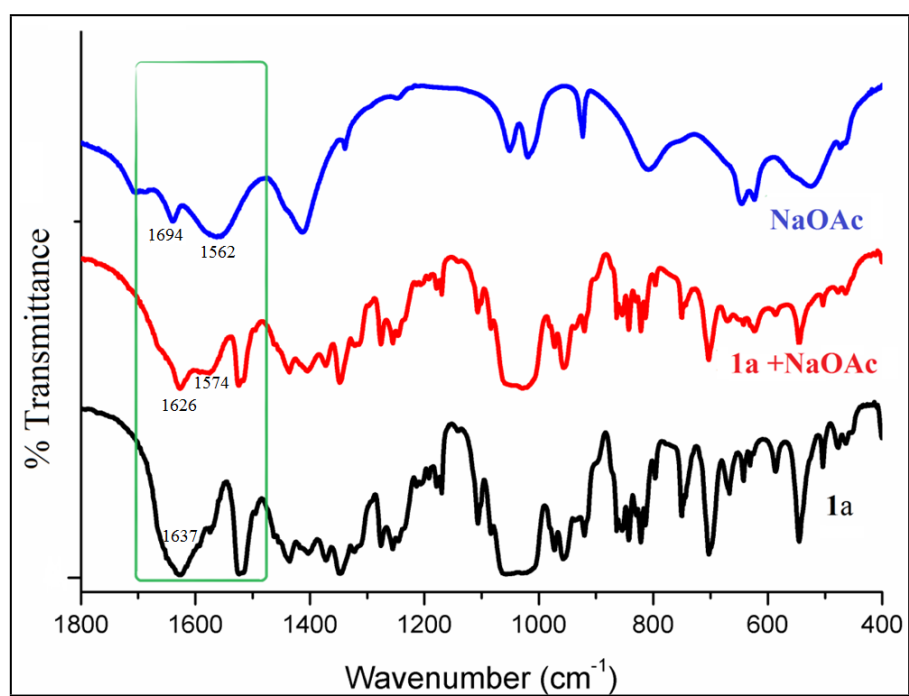

**Fig. S15** Comparison of FTIR spectra of NaOAc, **1a**, and **1a** + 0.5 eqv NaOAc.



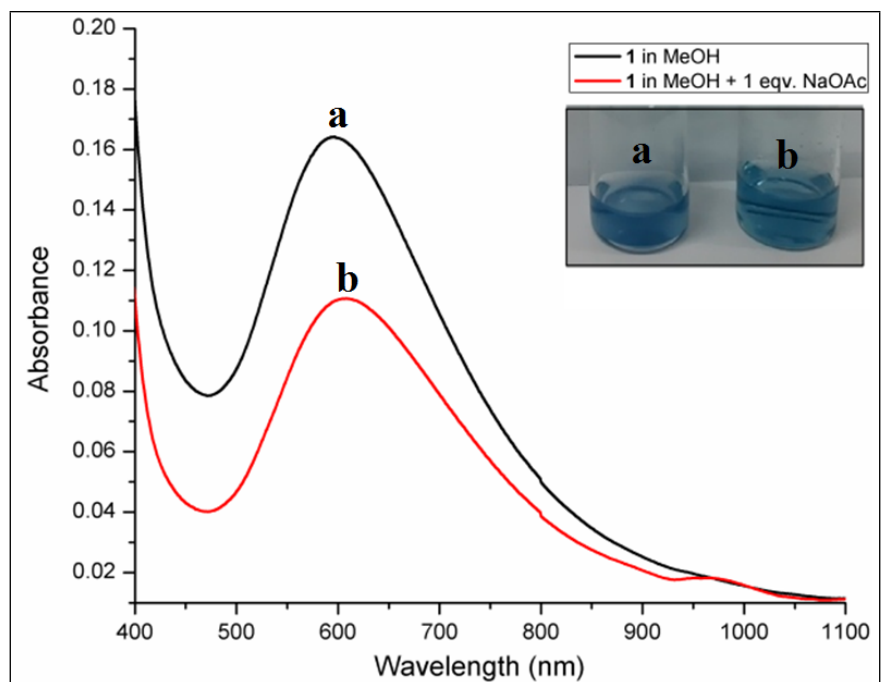

**Fig. S16** Effect of NaOAc on the absorption spectra of **1b** in methanol.

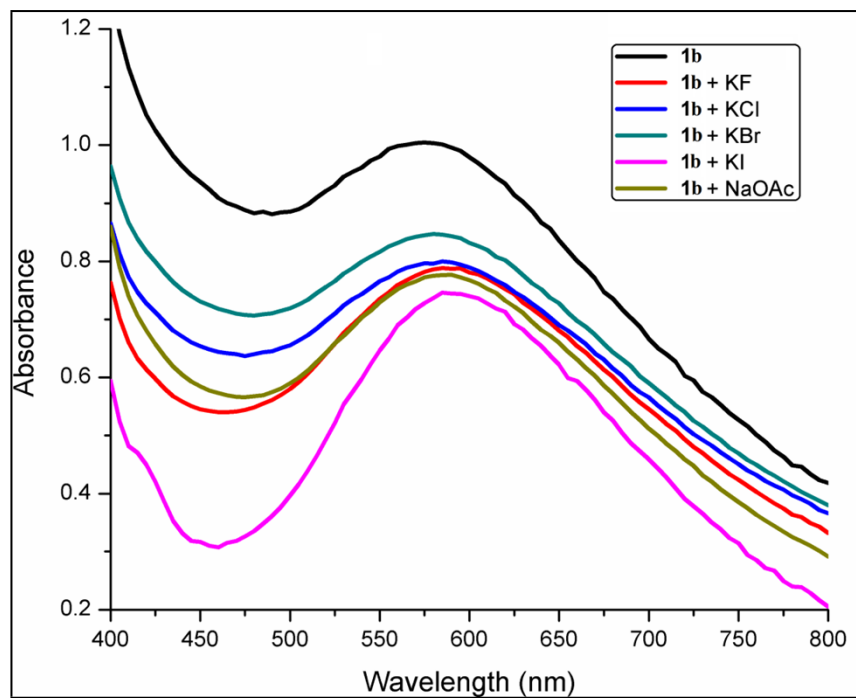

**Fig. S17** Effect of anions on the absorption spectra of **1b** in methanol.

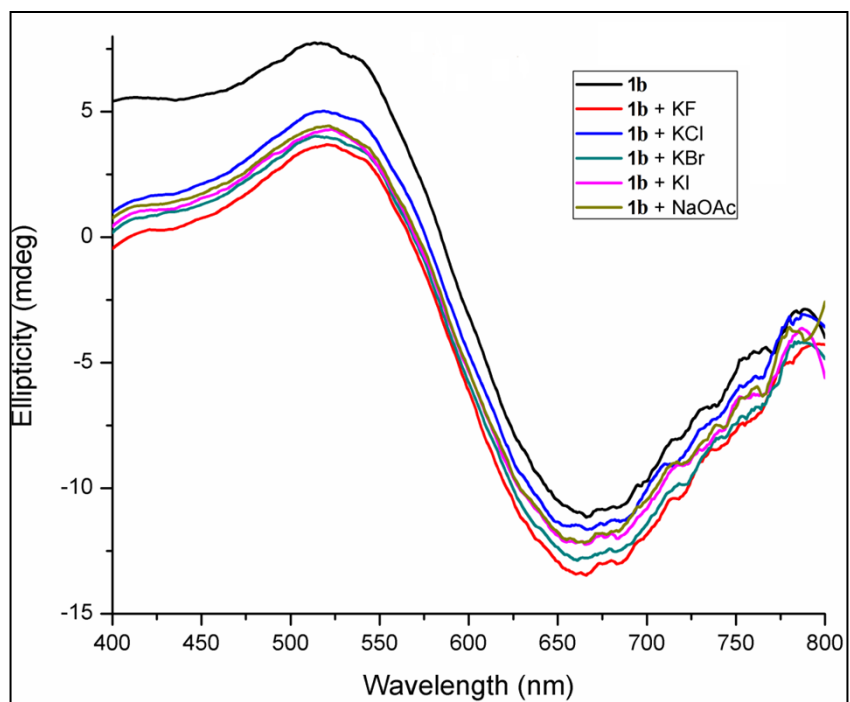

**Fig. S18** Effect of anions on the CD spectra of **1b** in methanol.

Table S1. Selected Bond Lengths (Å) and Bond Angles (degrees) for **1a** and **1b**.

Bond Lengths

**1a**

|        |          |        |          |
|--------|----------|--------|----------|
| Cu1-O5 | 1.919(3) | Cu1-O5 | 1.919(3) |
| Cu1-N1 | 2.022(4) | Cu1-N1 | 2.022(4) |
| Cu1-O1 | 2.183(6) |        |          |

**1b**

|         |          |        |          |
|---------|----------|--------|----------|
| Cu1-O8  | 1.933(5) | Cu1-O3 | 1.955(6) |
| Cu1-N1  | 2.021(6) | Cu1-N2 | 2.034(6) |
| Cu1-O11 | 2.197(5) |        |          |

Bond Angles

**1a**

|            |            |            |            |
|------------|------------|------------|------------|
| O5-Cu1-O5  | 176.8(3)   | O5-Cu1-N1  | 84.40(13)  |
| O5-Cu1-N1  | 94.68(13)  | O5-Cu1-N1  | 94.68(13)  |
| O5-Cu1-N1  | 84.40(13)  | N1-Cu1-N1  | 147.2(2)   |
| O5-Cu1-O1  | 91.61(15)  | O5-Cu1-O1  | 91.61(15)  |
| N1-Cu1-O1  | 106.39(11) | N1-Cu1-O1  | 106.39(11) |
| C14-O5-Cu1 | 115.2(2)   | C15-N1-Cu1 | 106.8(2)   |
| C7-N1-Cu1  | 109.3(3)   |            |            |

**1b**

|            |          |            |          |
|------------|----------|------------|----------|
| O8-Cu1-O3  | 171.8(2) | O8-Cu1-N1  | 84.7(2)  |
| O3-Cu1-N1  | 95.3(2)  | O8-Cu1-N2  | 92.8(2)  |
| O3-Cu1-N2  | 84.6(2)  | N1-Cu1-N2  | 161.4(2) |
| O8-Cu1-O11 | 99.4(3)  | O3-Cu1-O11 | 88.7(3)  |
| N1-Cu1-O11 | 95.8(2)  | N2-Cu1-O11 | 102.8(2) |
| C25-O8-Cu1 | 116.5(5) | C24-N1-Cu1 | 109.8(4) |
| C26-N1-Cu1 | 112.8(5) | C9-O3-Cu1  | 114.2(5) |

Table S2. Hydrogen Bonding Parameters for **1a** and **1b**.

| D-H..A         | r(D-H) (Å) | r(H..A) (Å) | r(D..A) (Å) | ∠D-H..A (°) | Symmetry        |
|----------------|------------|-------------|-------------|-------------|-----------------|
| <b>1a</b>      |            |             |             |             |                 |
| O1-H1..O4      | 0.84       | 1.89        | 2.734(6)    | 171         | 1/2-x,1/2+y,1-z |
| O7-H7..O6      | 0.82       | 1.83        | 2.650(6)    | 176         | 1-x,y,-z        |
| C7-H7B..O4     | 0.97       | 2.34        | 3.299(6)    | 168         | 1/2+x,-1/2+y,z  |
| C18-H18B..O(6) | 0.96       | 2.59        | 3.401(9)    | 143         | 1/2-x,-1/2+y,-z |
| <b>1b</b>      |            |             |             |             |                 |
| O6-H6..O7      | 0.82       | 2.03        | 2.810(7)    | 158         | 2-x,1/2+y,1-z   |
| O1-H1A..O2     | 0.82       | 1.90        | 2.692(8)    | 163         | 1-x,-1/2+y,-z   |
| O11-H11B..O12  | 0.85       | 1.96        | 2.781(8)    | 164         | 1+x,y,-1+z      |
| O11-H11A..O2   | 0.84       | 1.88        | 2.631(7)    | 147         | 2-x,-1/2+y,-z   |
| O12-H12A..O8   | 0.82       | 2.23        | 2.749(7)    | 152         | 1-x,1/2+y,1-z   |
| C18-H18..O7    | 0.93       | 2.57        | 3.270(9)    | 132         | 2-x,1/2+y,1-z   |
| C8-H8..O1      | 0.98       | 2.55        | 3.296(9)    | 133         | 1-x,1/2+y,-z    |
| C3-H3..O7      | 0.93       | 2.51        | 3.431(10)   | 168         | 2-x,1/2+y,-z    |
| C34-H34B..O5   | 0.96       | 2.48        | 3.420(14)   | 167         | x,y,1+z         |
